# Supplementary material for: Live Microscopy of Multicellular Spheroids with the Multimodal Near-Infrared Nanoparticles Reveals Differences in Oxygenation Gradients
Source: PubMed Central journal article supplement (PMC11100290; doi:10.1021/acsnano.3c12539), 2024-04-30
Supplement: nn3c12539_si_001.pdf [file nn3c12539_si_001.pdf]

# Supporting Information

## Live microscopy of multicellular spheroids with the multi-modal near-infrared nanoparticles reveals differences in oxygenation gradients

Angela C. Debruyne<sup>1</sup>, Irina A. Okkelman<sup>1,6</sup>, Nina Heymans<sup>1</sup>, Cláudio Pinheiro<sup>4,5</sup>, An Hendrix<sup>4,5</sup>, Max Nobis<sup>3</sup>, Sergey M. Borisov<sup>2\*</sup>, Ruslan I. Dmitriev<sup>1,6\*</sup>

<sup>1</sup> Tissue engineering and biomaterials group, Department of Human Structure and Repair, Faculty of Medicine and Health Sciences, Ghent University, C. Heymanslaan 10, 9000 Ghent, Belgium

<sup>2</sup> Institute of Analytical Chemistry and Food Chemistry, Graz University of Technology, Stremayrgasse 9, Graz, 8010 Austria

<sup>3</sup> Intravital Imaging Expertise Center, VIB Center for Cancer Biology, KU Leuven, 3000 Leuven, Belgium

<sup>4</sup> Laboratory of Experimental Cancer Research, Department of Human Structure and Repair, Ghent University, Ghent, Belgium

<sup>5</sup> Cancer Research Institute Ghent (CRIG), Ghent, Belgium

<sup>6</sup> Ghent Light Microscopy Core, Ghent University, 9000 Ghent, Belgium

\*To whom the correspondence should be addressed.

E-mail: [Ruslan.dmitriev@ugent.be](mailto:Ruslan.dmitriev@ugent.be) ; [sergey.borisov@tugraz.at](mailto:sergey.borisov@tugraz.at)

### Contents

Supplementary figures **S1-S27**.

Supplementary tables **ST1-ST3**.

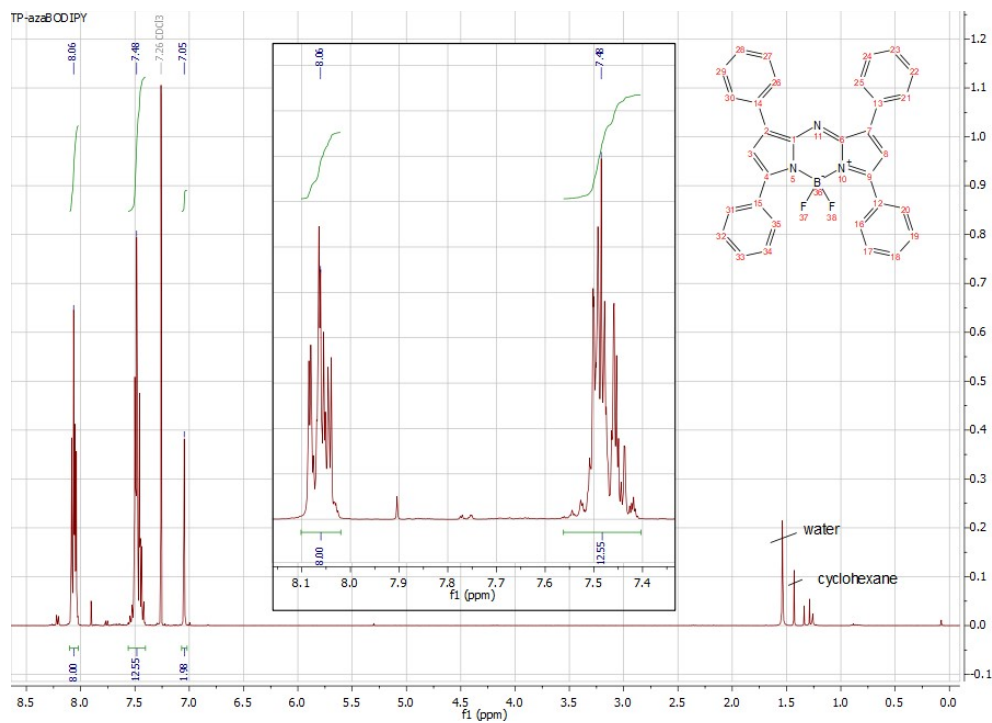

**Supplementary figure S1:**  $^1\text{H}$  NMR spectrum ( $\text{CDCl}_3$ , 400 MHz) of  $\text{BF}_2$  chelate of (3,5-diphenyl-1H-pyrrol-2-yl)(3,5-diphenylpyrrol-2-ylidene)amine (“aza-BODIPY”).

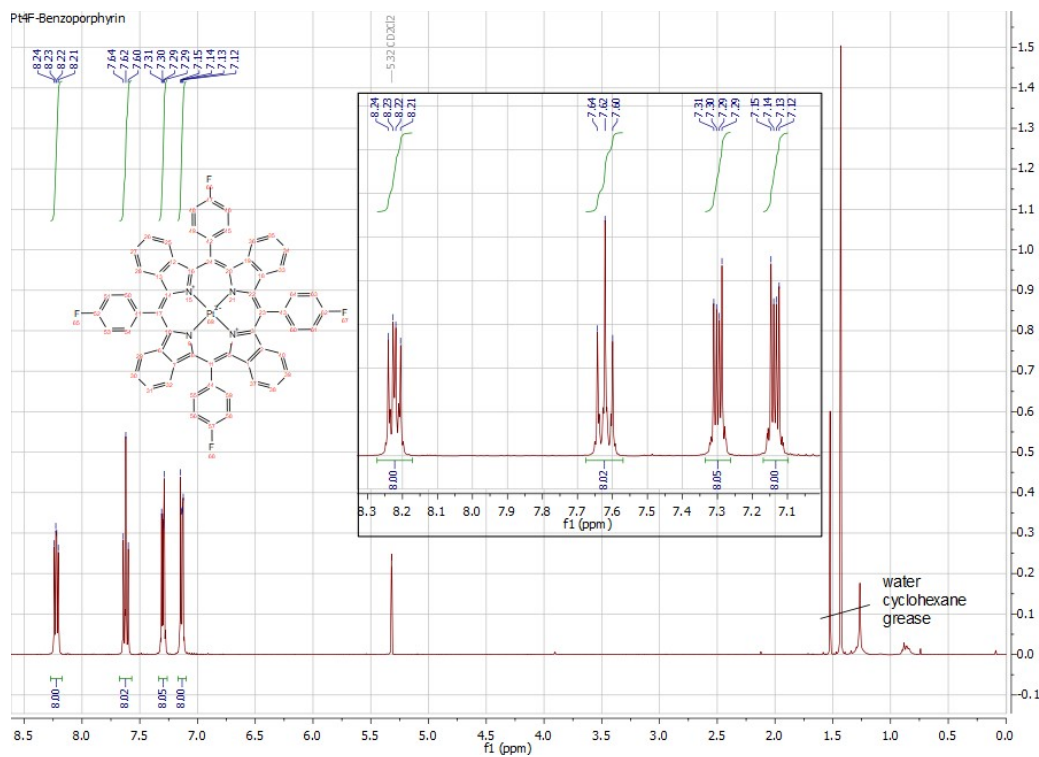

**Supplementary figure S2:**  $^1\text{H}$  NMR spectrum ( $\text{CD}_2\text{Cl}_2$ , 400 MHz) of PtTPTBPF.

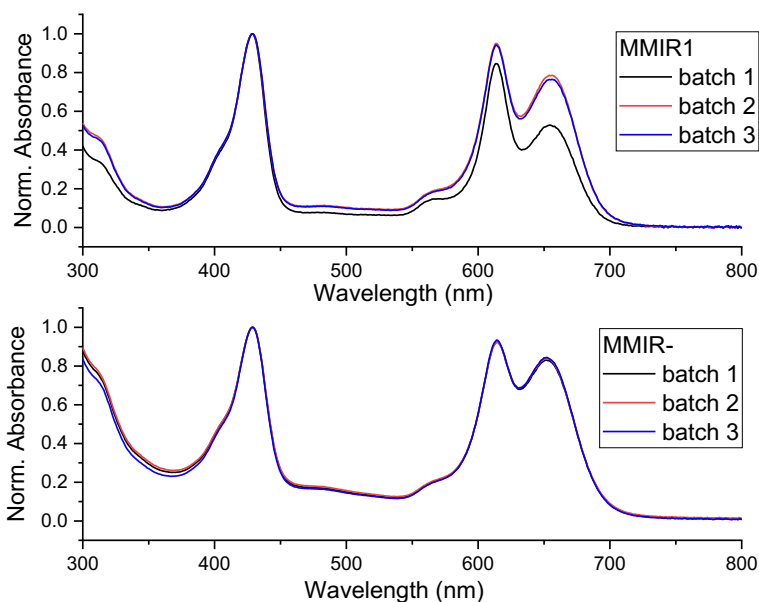

**Supplementary figure S3:** Normalized absorption spectra of the particles (1:1 wt. ratio of the dyes) for 3 different batches of each type.

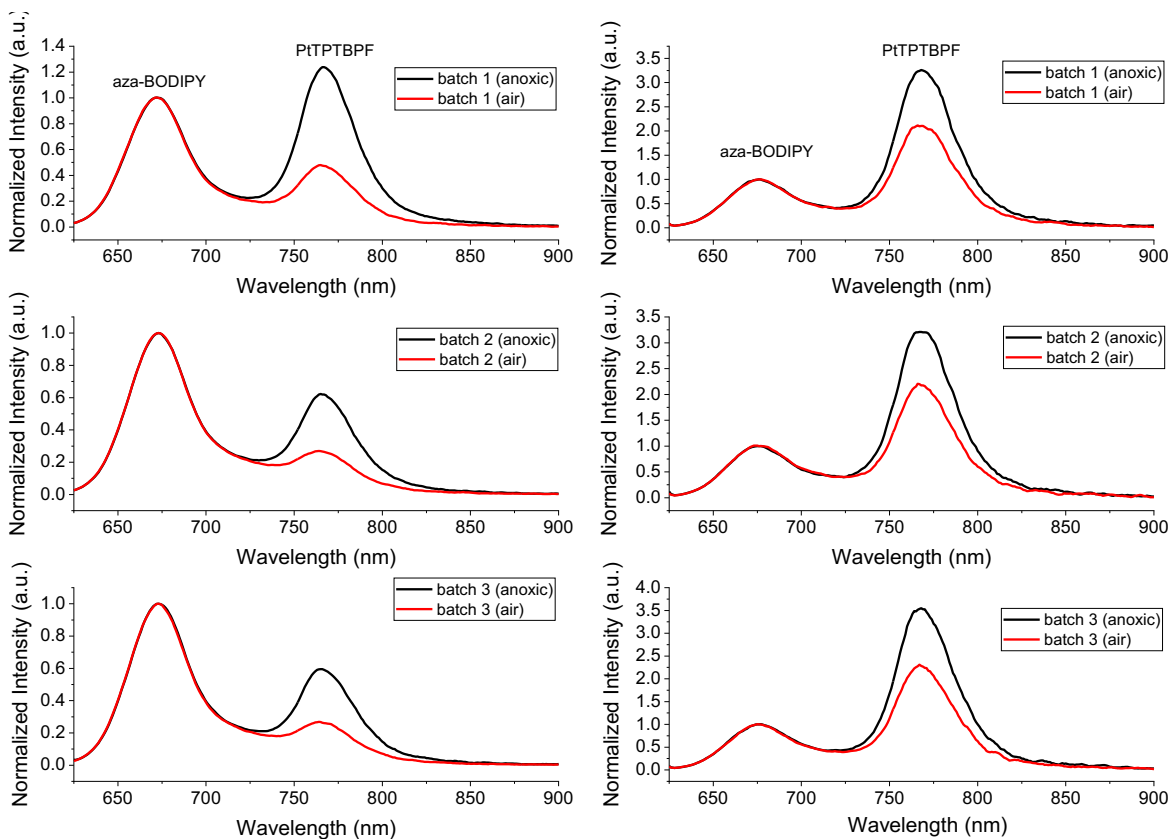

**Supplementary figure S4:** Emission spectra ( $\lambda_{exc} = 615$  nm) of the particles (1:1 wt. ratio of the dyes) for three different batches of each type. Left row: MMIR1, right row: MMIR- beads.

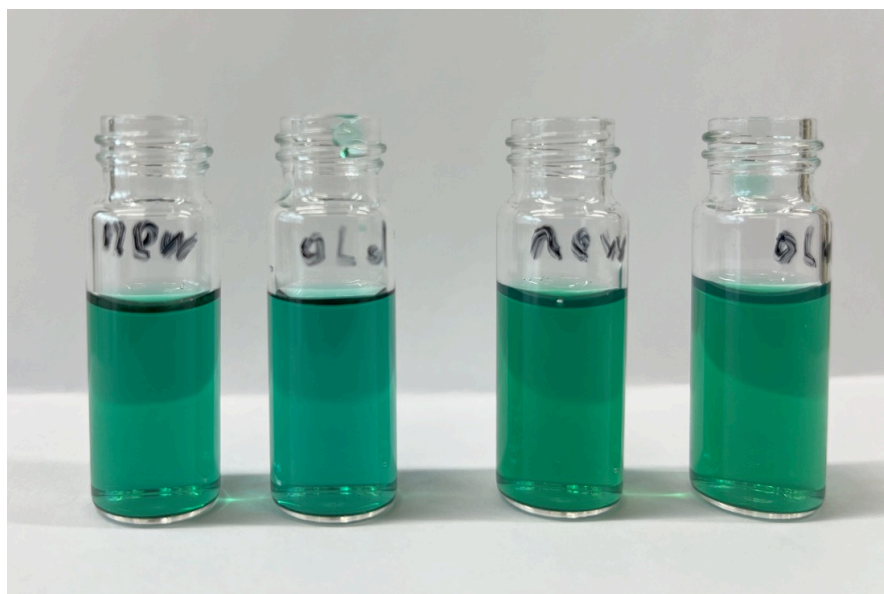

**Supplementary figure S5:** Appearance of aqueous dispersions of the nanoparticles (concentration 2 mg/mL). From left to right: MMIR after two weeks storage at 4 °C, MMIR1 after ~2 years storage at 4 °C, MMIR- after 2 weeks storage at 4 °C, MMIR- after ~2 years storage at 4 °C.

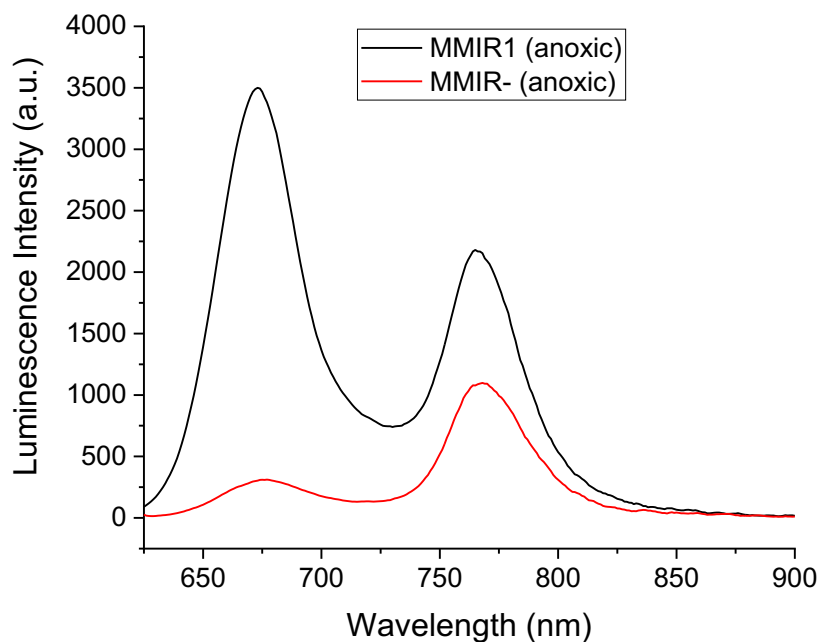

**Supplementary figure S6:** Emission spectra of MMIR1 and MMIR- nanoparticles (dye ratio 1:1) in anoxic water. The absorption of both dispersions was identical at the excitation wavelength (615 nm).



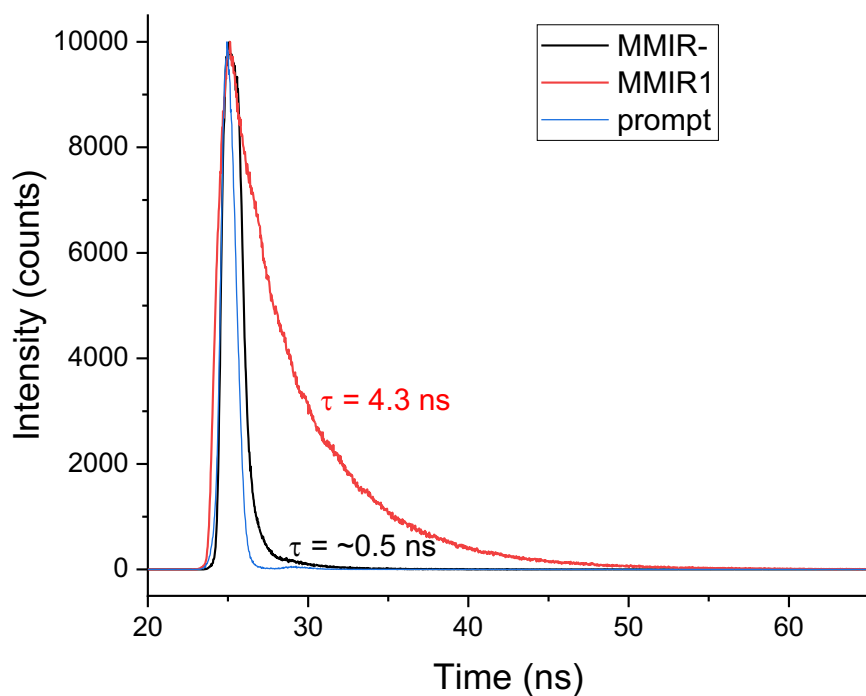

**Supplementary figure S7:** Luminescence decays of the reference dye in MMIR1 and MMIR-beads (both 1:1 ratio of the dyes) monitored at 660 nm ( $\lambda_{\text{exc}} = 635 \text{ nm}$ , NanoLED, Horiba; 23 °C).

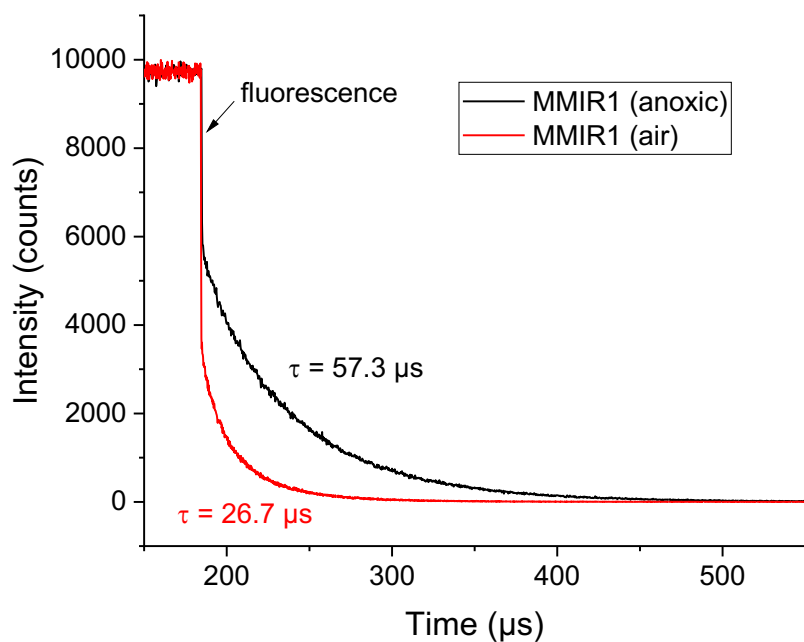

**Supplementary figure S8:** Phosphorescence decay of PtTPTBPF in MMIR1 beads (1:1 ratio of the dyes) monitored at 760 nm ( $\lambda_{\text{exc}} = 456 \text{ nm}$ , SpectraLED from Horiba; 23 °C).

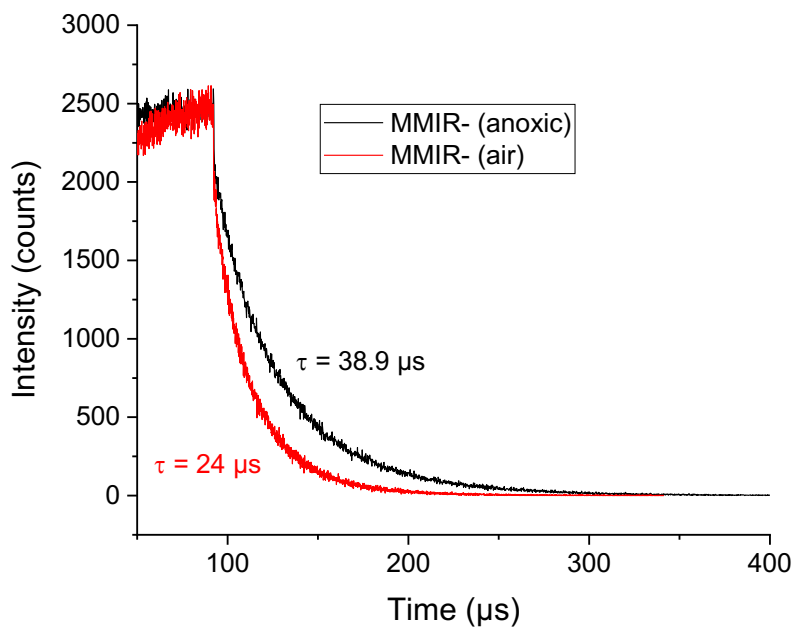

**Supplementary figure S9:** Phosphorescence decay of PtTPTBPF in MMIR- beads (1:1 ratio of the dyes) monitored at 760 nm ( $\lambda_{\text{exc}} = 455$  nm, SpectraLED from Horiba; 23 °C).

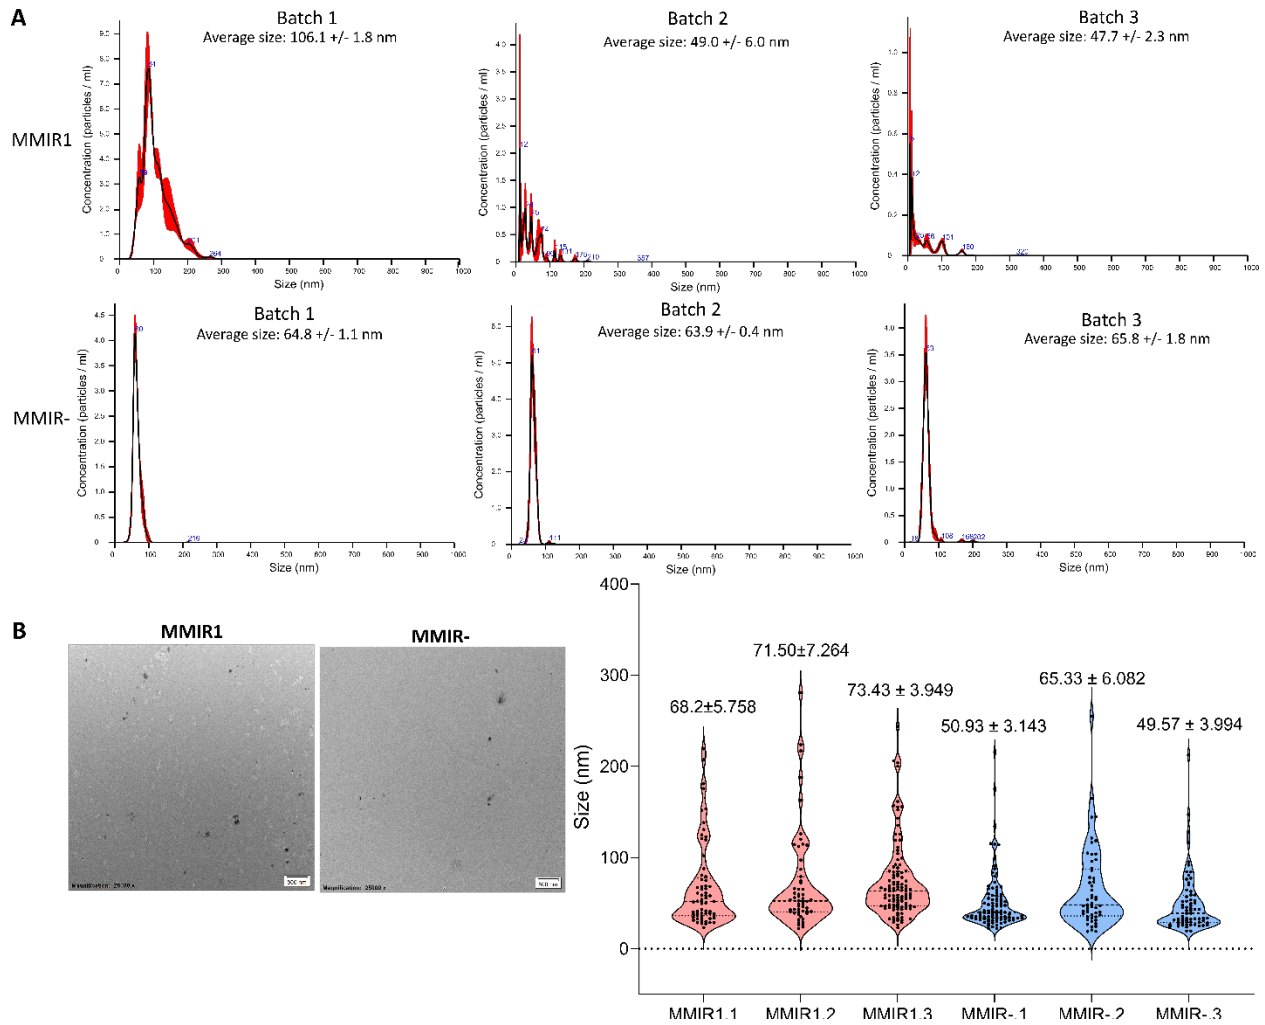

**Supplementary figure S10:** Nanoparticle size measurements of three production batches of MMIR1 and MMIR- using NanoSight (A) and TEM (B) methods. A: for each batch, three 30 second videos were used for the NanoParticle Tracking Analysis (NTA). Red error bars indicate  $\pm$  SEM. B: Data shows for each batch the average size  $\pm$  standard error of 53-110 counted nanoparticles. Scale bar is 200 nm.

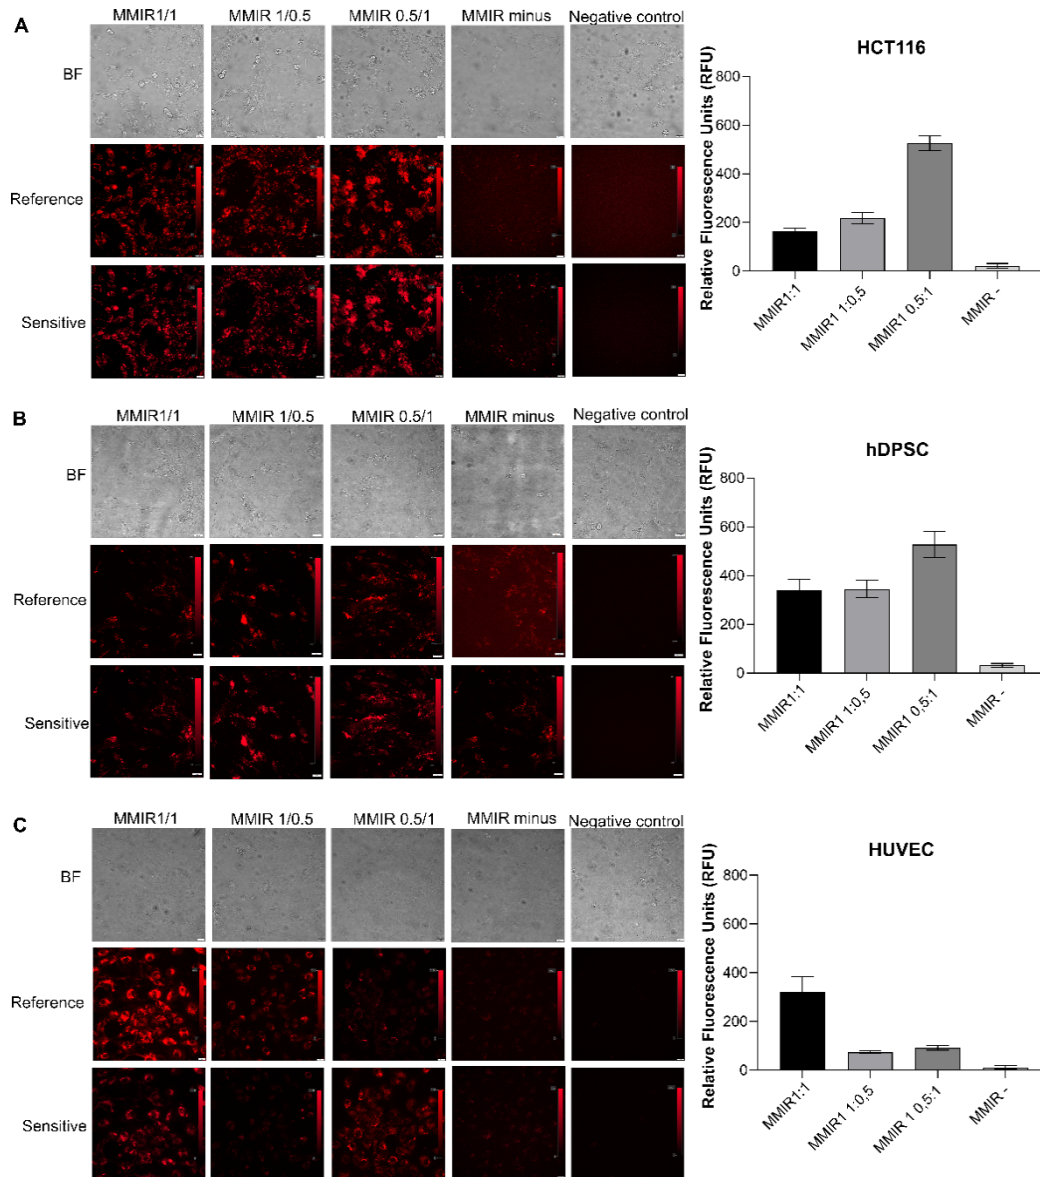

**Supplementary figure S11: Comparison of positively charged MMIR1 with different sensitive/reference dye ratios and negatively charged (1:1) MMIR- probe.** A: Fluorescence images of HCT116 cells stained overnight (5  $\mu\text{g/ml}$ , overnight staining). B: Fluorescence images of human DPSCs cells stained overnight (5  $\mu\text{g/ml}$ , overnight staining). C: Fluorescence images of HUVEC cells stained overnight (5  $\mu\text{g/ml}$ , overnight staining). Results show brightfield (BF) images and both reference and sensitive fluorescence channels with scale bar (20  $\mu\text{m}$ ) and intensity bar. Relative fluorescence units (RFU) of the reference dye is shown for each cell line on the right. Results show the average  $\pm$  standard error of 3 replicates.

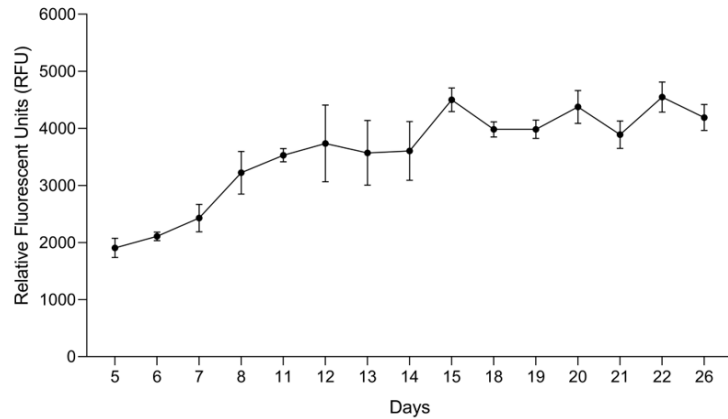

**Supplementary figure S12: Fluorescence signals of MMIR1-stained HCT116 spheroids over 26 days period.** Formation on an ultra-low attachment 96-well plate with addition of MMIR (10  $\mu\text{g}/\text{ml}$ ) and imaged using widefield fluorescence inverted microscope IX81 (Olympus). Data show the mean  $\pm$  standard error for 3 spheroids (reference channel).

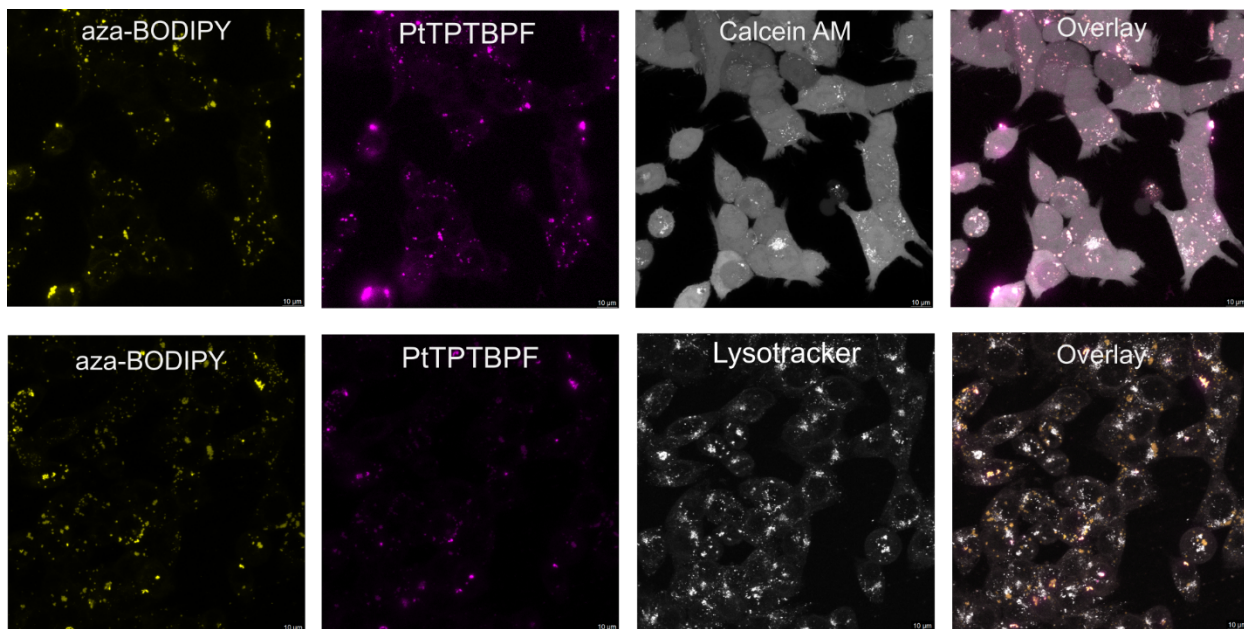

**Supplementary figure S13: Intracellular localization of MMIR1 after overnight incubation with HCT116 cells (5  $\mu\text{g}/\text{ml}$ , 17 h) shows endo- and lysosomal localization.** Cells were co-stained for 2 hours with Calcein Green (25  $\text{ng}/\text{ml}$ ) and LysoTracker Green (200  $\text{nM}$ ). Confocal single optical sections are shown. Scale bar is 10  $\mu\text{m}$ .

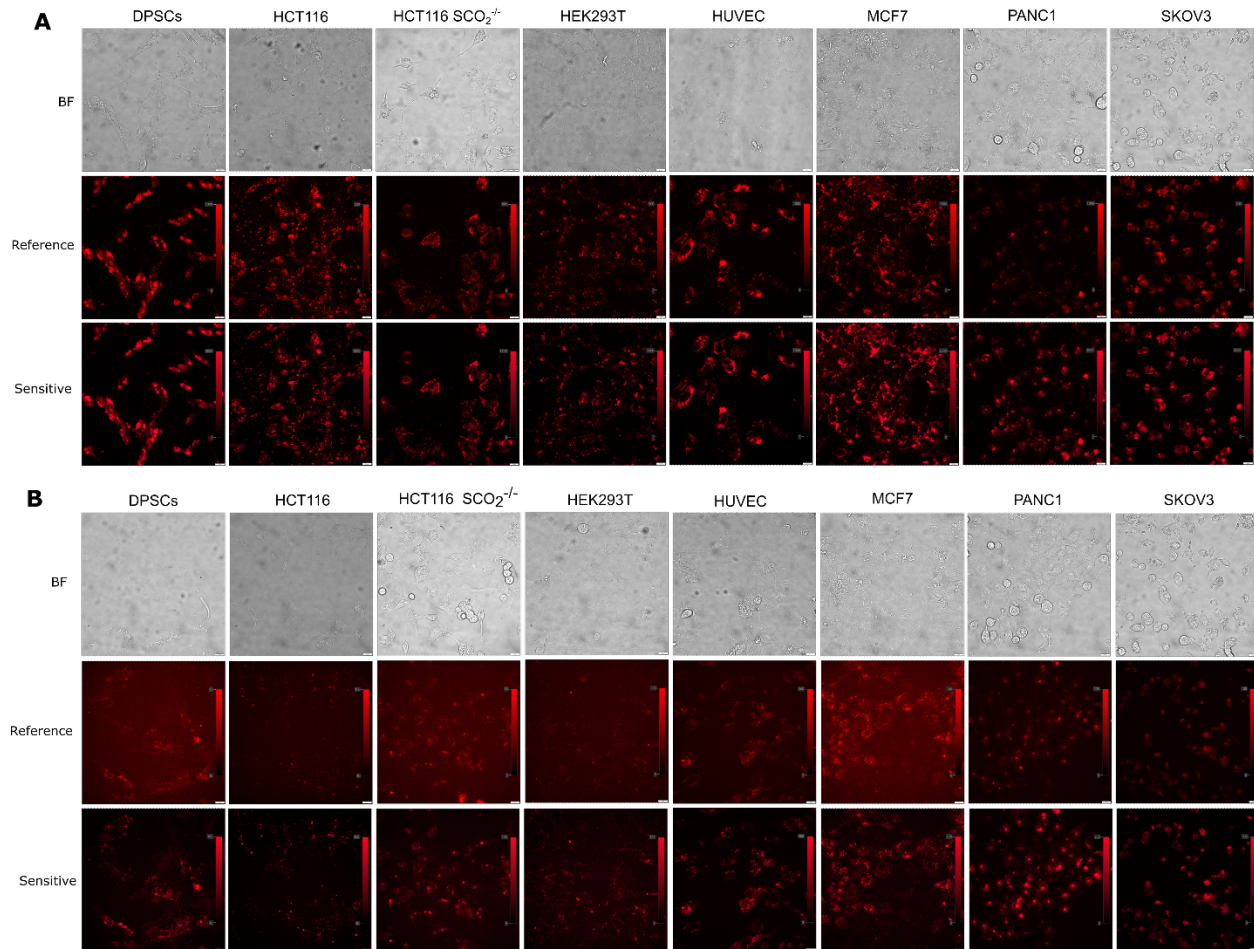

**Supplementary figure S14: Cell line-dependent uptake of the positive (RL100) and negative (PMMA) charged MMIR probes.** A: Fluorescence images of MMIR (5 µg/ml). B: Fluorescence images of MMIR- (5 µg/ml). Results show brightfield (BF) images and reference and sensitive fluorescence channels with scale bar (20 µm) and intensity bar. C: The relative fluorescence units of the reference dye in the RL100 NP and PMMA NP. Data shown is an average of 3 repeats (with background subtraction) ± SEM. DPSCs: dental pulp stem cells, HCT116: human colon cancer cell line, HEK293T: Human embryonic kidney cells, HUVEC: human umbilical vein endothelial cells, MCF7: epithelial metastatic adenocarcinoma, PANC1: pancreas epithelioid carcinoma, SKOV3: ovarian adenocarcinoma and RFU: Relative fluorescence units



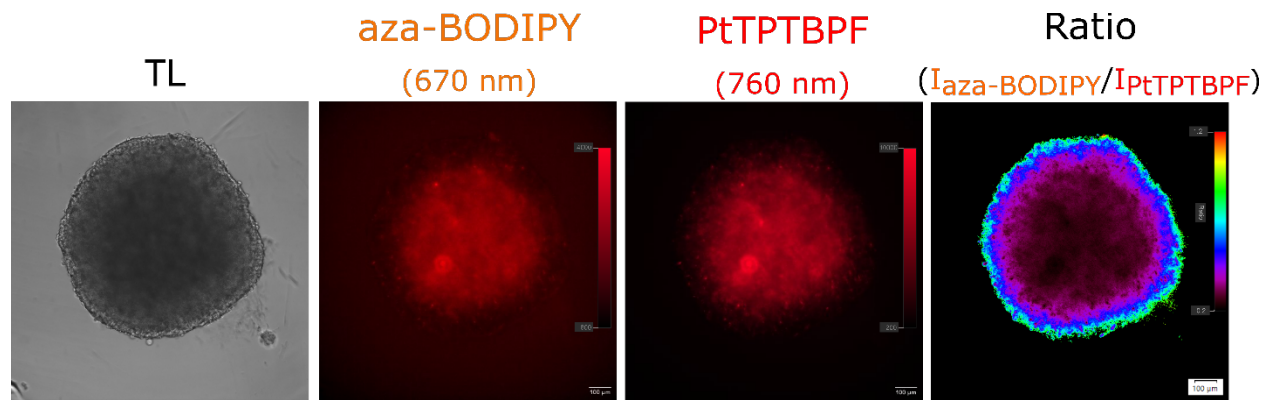

**Supplementary figure S15: Pre-staining of HCT116 cells overnight ensures uniform staining.** HCT116 cells were stained overnight with MMIR1 (50 μg/ml, 17 h), before formation using Lipidure<sup>®</sup>-coated plates. Imaged using widefield fluorescence inverted microscope IX81 (Olympus). Scale bar is 100 μm.

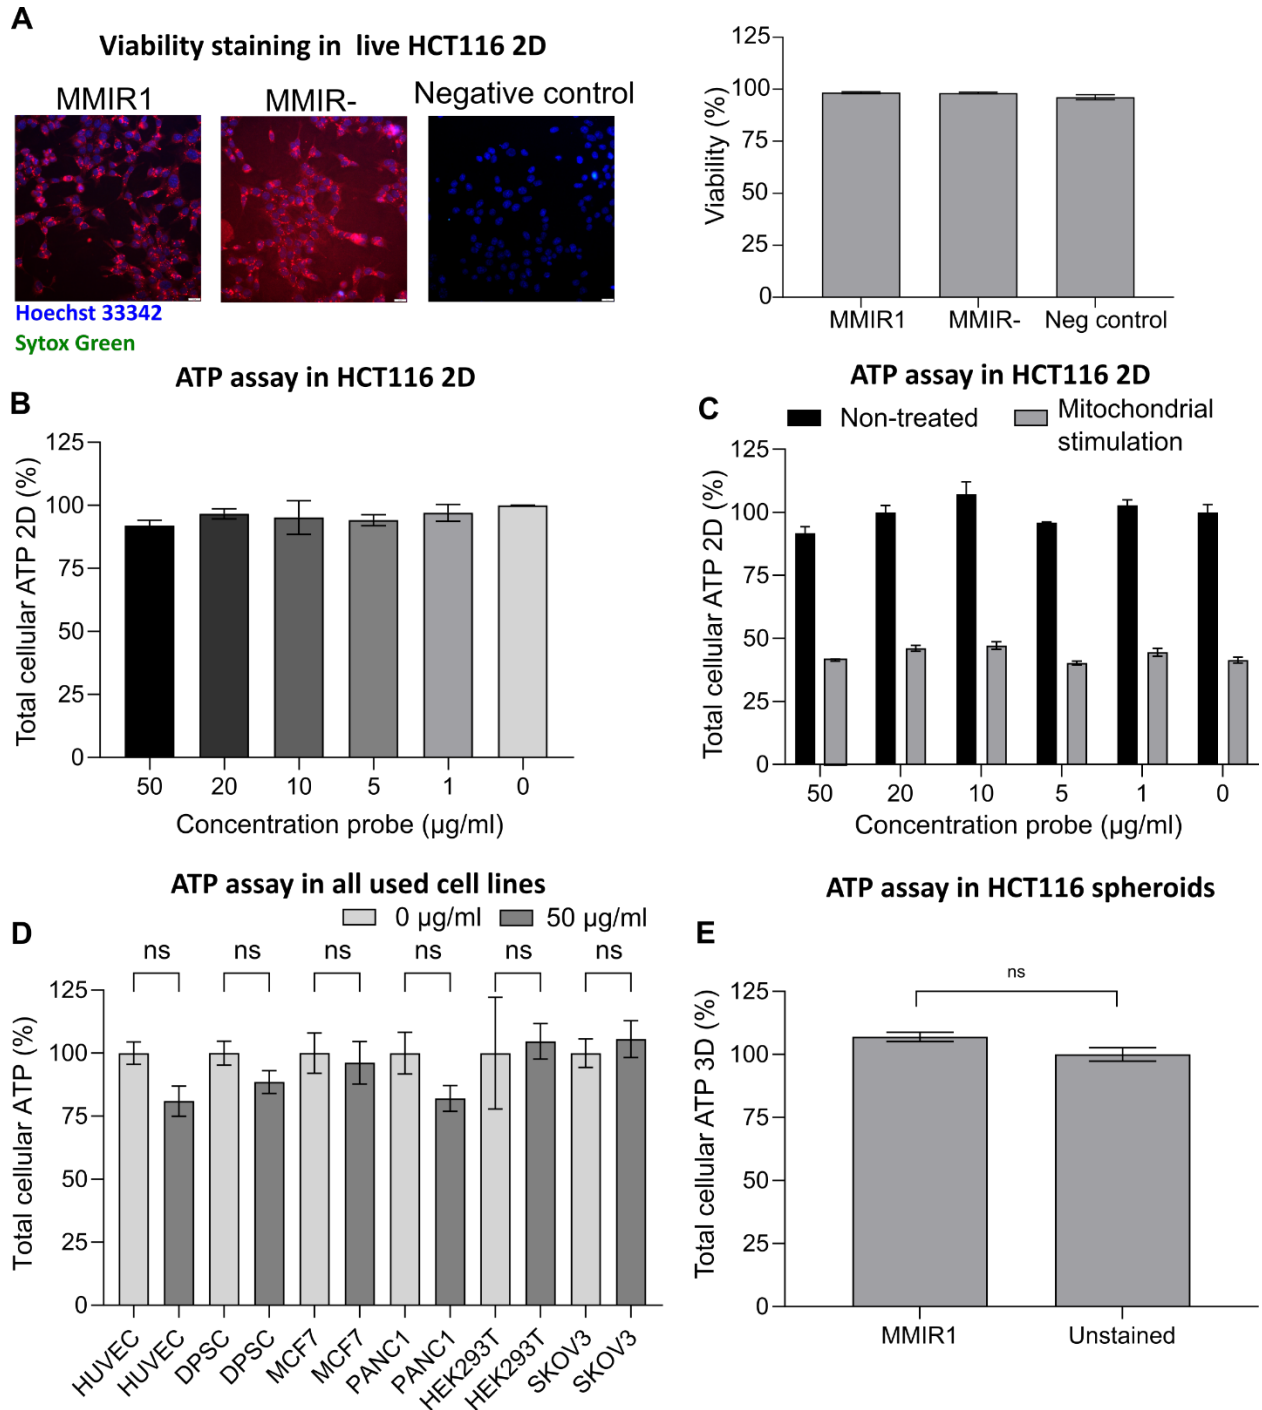

**Supplementary figure S16: Addition of MMIR probes shows no significant cell death in monolayer and spheroids of HCT116 cells.** A: Merged fluorescent images of HCT116 cells stained overnight with MMIR1 (5 µg/ml) and MMIR- (20 µg/ml) multiplexed with Hoechst 33342 (0,5 µM) and Sytox green (30 nM). Data shows the average number of viable cells /total cell number ± standard error of 4 replicates. B: Viability assay using CellTiter-Glo Luminescent Cell Viability assay (Promega) shows no statistical cellular toxicity after 17 h incubation of MMIR1 probe (0 - 50 µg/ml) on live HCT116 cells. Results were normalized by extracting the total cell proteins and BCA assay, showing the average with background subtraction ± standard error of



12 replicates. C: Normalized viability of HCT116 cells, stained with MMIR1 and treated with mitochondrial uncoupler FCCP (4  $\mu$ M) and inhibitors oligomycin A (10  $\mu$ M) 5 min before the cell lysis. Data shows the average with background subtraction  $\pm$  standard error of 4 spheroids. D: Normalized effect of MMIR1 on overall viability (total cell ATP) of cancer and non-cancer cell lines in 2D. Data shows the average with background subtraction  $\pm$  standard error of 3-5 repeats. E: ATP assay in 3D for HCT116 spheroids, stained with MMIR1 and normalized by their size (area square). Data shows the average with background subtraction  $\pm$  standard error of 8-12 spheroids.

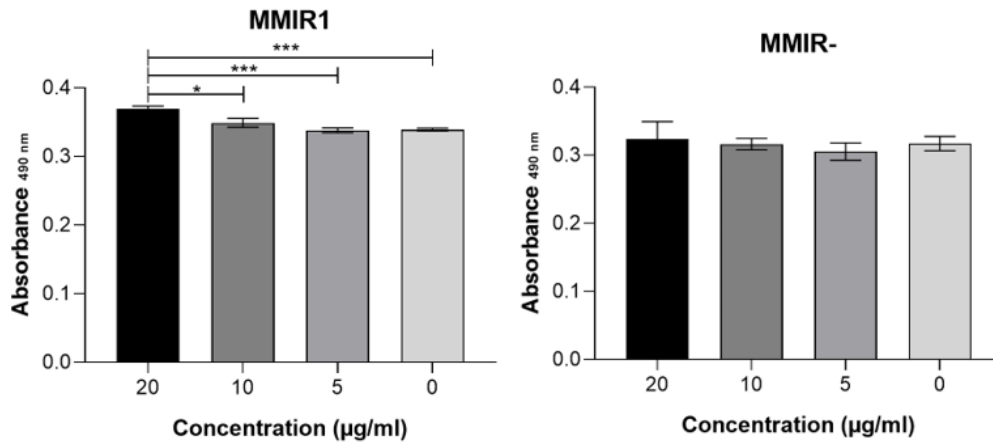

**Supplementary figure S17: Viability assay using the CellTiter 96 Aqueous Non-Radioactive Cell Proliferation Assay (MTS, Promega) shows no cellular toxicity due to 24 h incubation of both cationic (MMIR1) and negatively charged (MMIR-) nanosensors with live HCT116 cells. Results shown are the average with background subtraction  $\pm$  standard error of 6 repeats.**

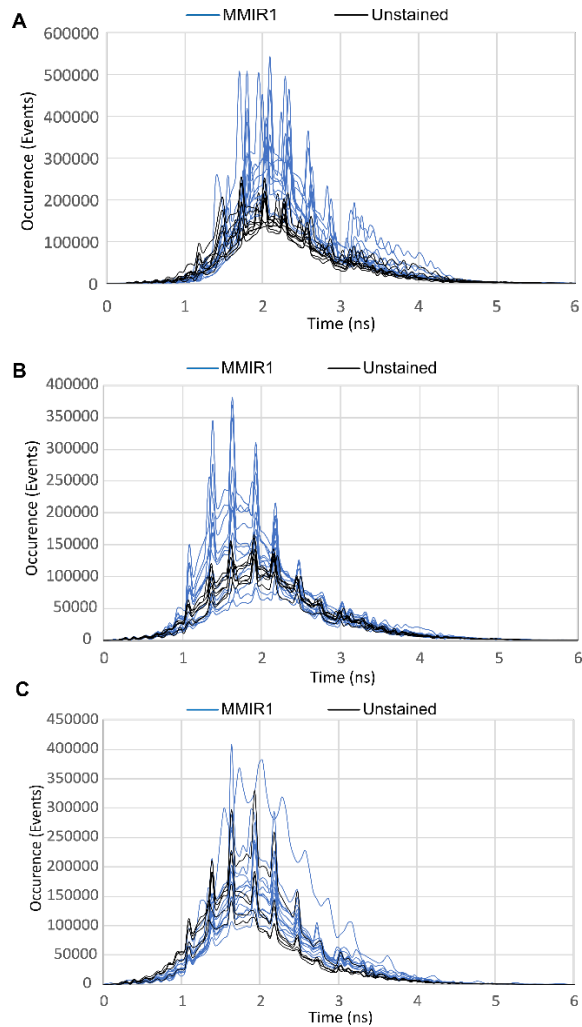

**Supplementary figure S18: Two-photon FLIM of NAD(P)H shows no changes in cell redox (NAD(P)H fluorescence lifetimes) in response to MMIR1 addition to live HCT116 spheroids.** Fluorescence lifetime histograms of unstained (black) and MMIR1 (10  $\mu\text{g/ml}$ , blue)-stained HCT116 spheroids with initial seeding densities of 50 (A), 500 (B), and 10,000 (C) cells per spheroid and 4-5 days growth.

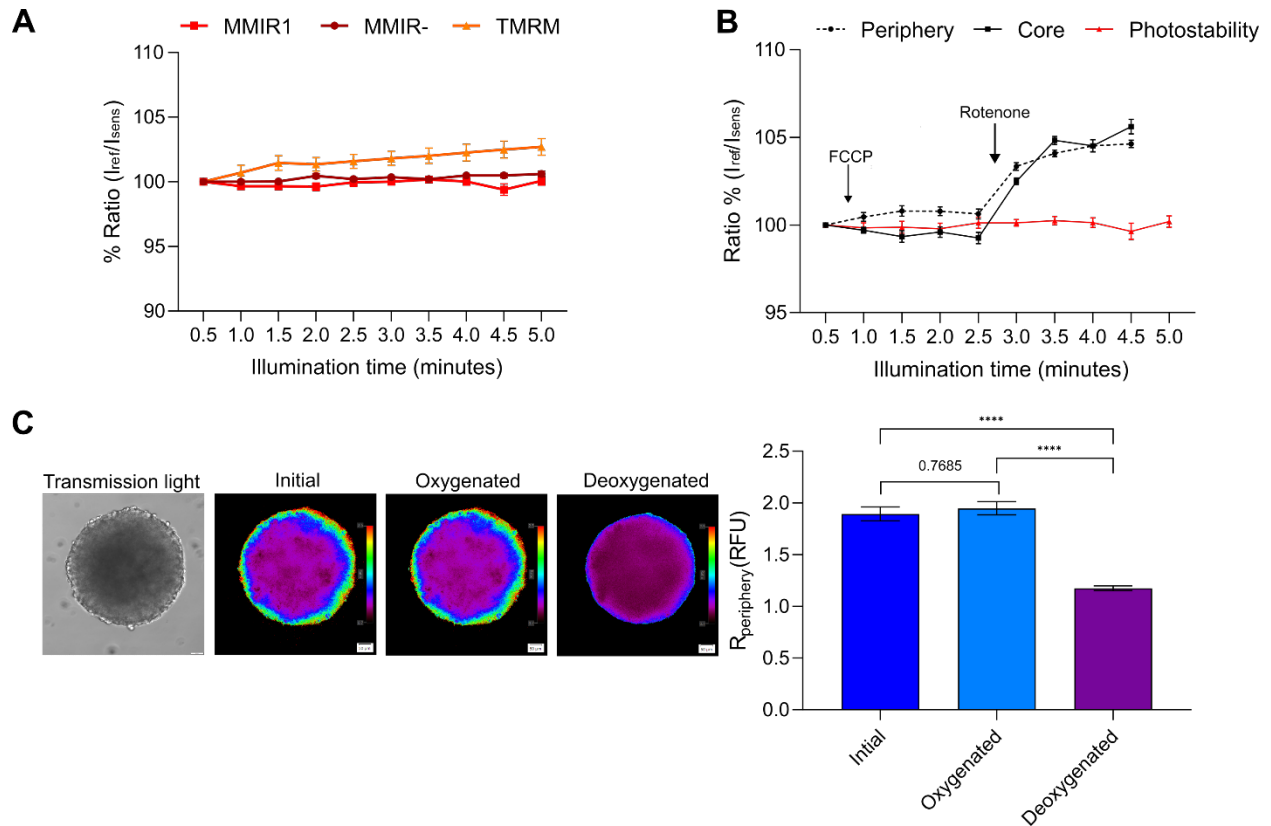

**Supplementary figure S19: Dynamic response of MMIR probes to drugs affecting cell bioenergetics and deoxygenation.** A: Photostability of both MMIR1 and MMIR- in HCT116 spheroids after repeated illumination. Commercially cationic orange-red mitochondrial dye TMRM was used as a reference. N=10 B: Kinetic response of MMIR1 intensity ratio to mitochondrial uncoupler (1  $\mu$ M FCCP) and mitochondrial inhibitor (1  $\mu$ M Rotenone) in comparison to photostability kinetics (%). C: Changes in intensity ratio in HCT116 spheroid at oxygenated (1  $\mu$ M Antimycin A and 1  $\mu$ M Rotenone) and subsequently deoxygenated (250  $\mu$ g/ml glucose oxidase and potassium sulfite solution addition). Scale bar 100  $\mu$ m. Significant difference in intensity of O<sub>2</sub>-sensitive dye between oxygenated and deoxygenated spheroids. TMRM: Tetramethylrhodamine, methyl ester. \*\*\*\*: P < 0.0001.

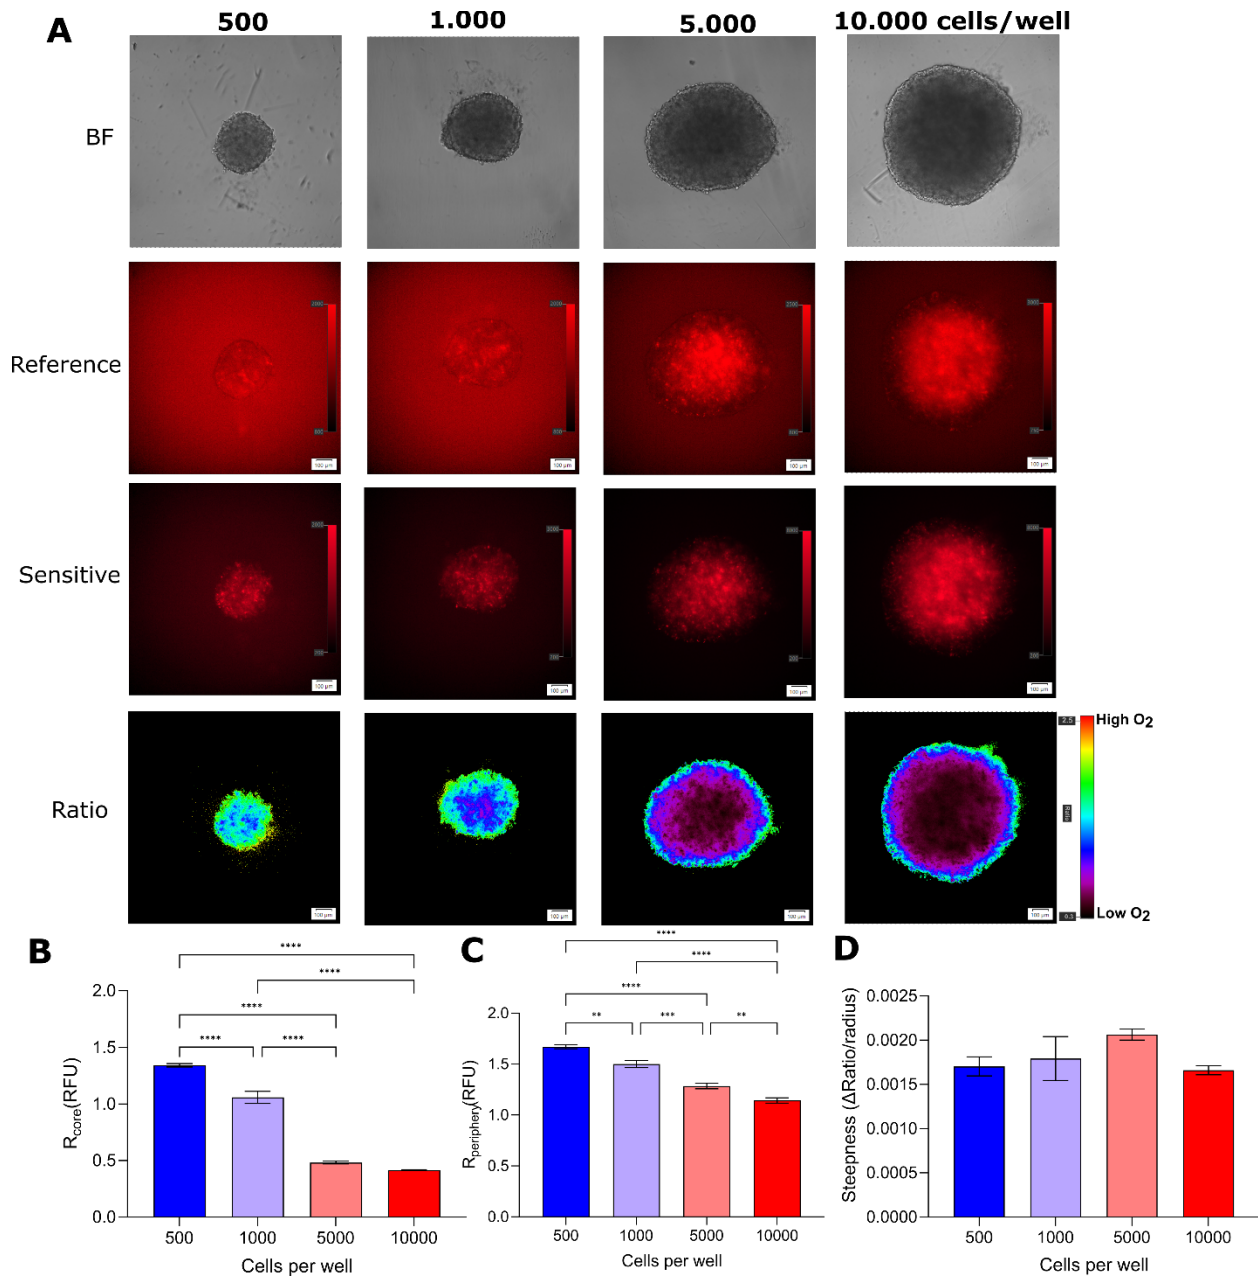

**Supplementary figure S20: Size-dependent oxygenation of live HCT116 cells spheroids.** A: HCT116 cells formed on a lipidure-coated plate in multiple sizes (500, 1,000, 5,000, and 10,000 cells per well) for 5 days, show a decrease in oxygenation in bigger spheroids due to limited oxygenation diffusion. Scale bar is 100  $\mu\text{m}$ . B: MMIR1 ratio measurements at the periphery. C: MMIR1 ratio measurements at the core. D: Steepness of the oxygenation gradient. Results show the average  $\pm$  standard error of 6 spheroids.

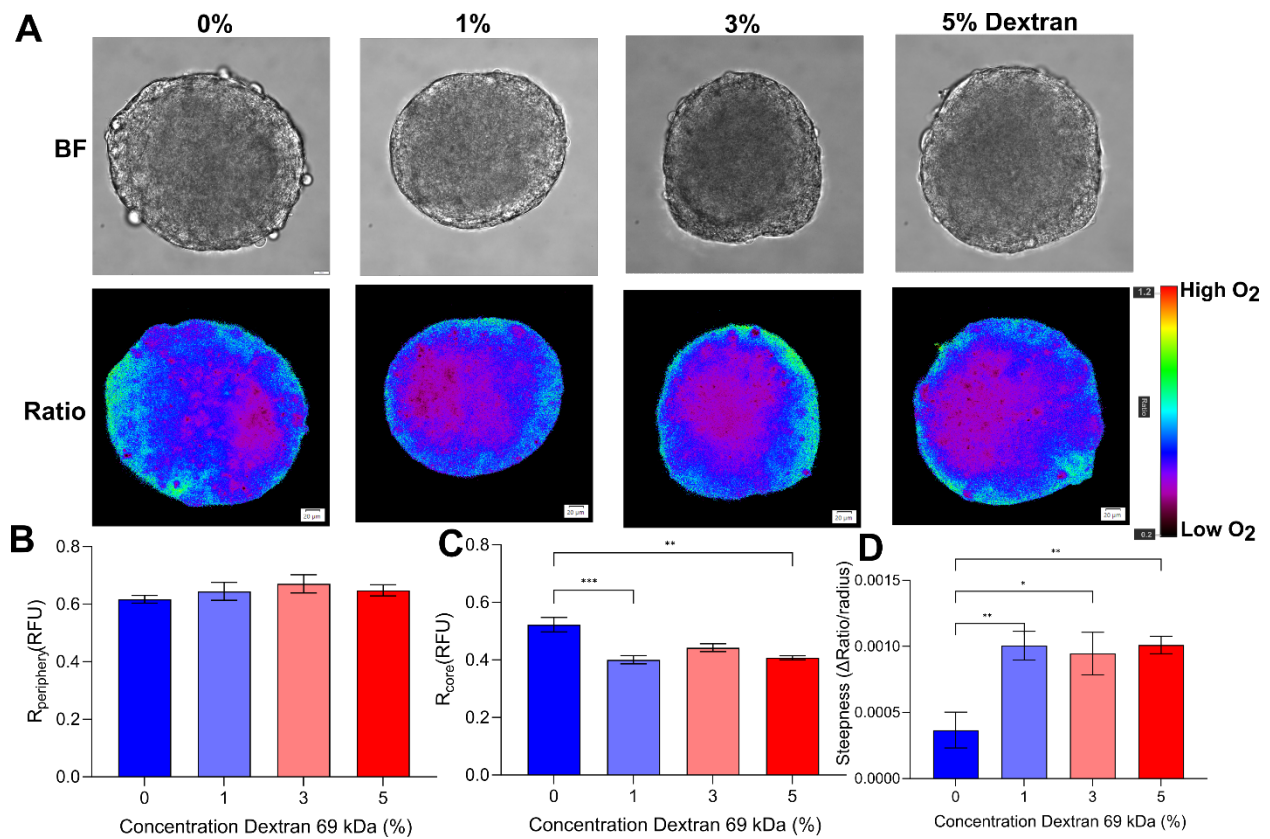

**Supplementary figure S21: Increased cell medium viscosity results in the formation of a more hypoxic core.** A: HCT116 spheroids formed using agarose micromolds were adapted to imaging media containing 0-5% dextran (0.77- 2.25 cP) for 4 h before imaging. Scale bar is 20  $\mu$ m. B: MMIR1 ratio measurements at the periphery. C: MMIR1 ratio measurements at the core. D: Steepness of the oxygenation gradient. Results show the average  $\pm$  standard error of 9 spheroids.

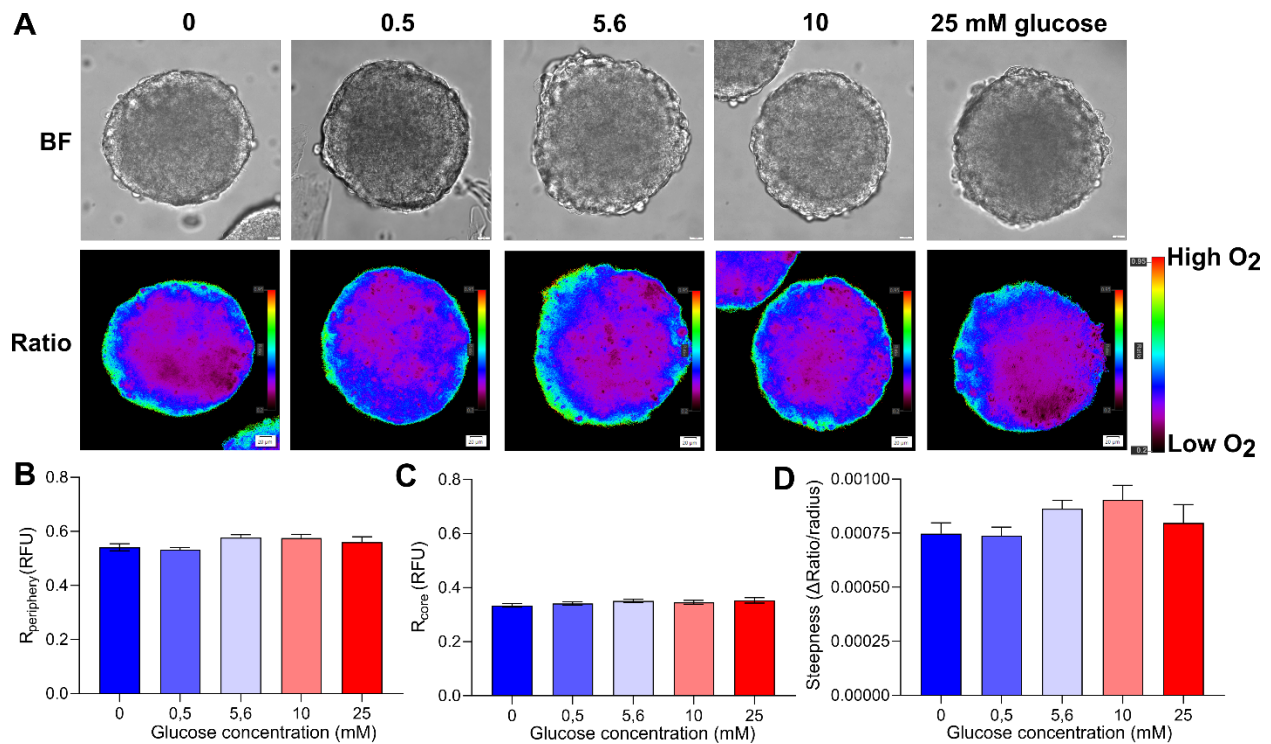

**Supplementary figure S22: Decreased cell media glucose concentration does not affect spheroids oxygenation.** A: HCT 116 spheroids formed using agarose micromolds were adapted to imaging media containing 0-25 mM D(+)-glucose for 4 h before imaging. Scale bar is 20  $\mu\text{m}$ . B: MMIR1 ratio measurements at the periphery. C: MMIR1 ratio measurements at the core. D: Steepness of the oxygenation gradient. Results show the average  $\pm$  standard error of 9-14 spheroids.

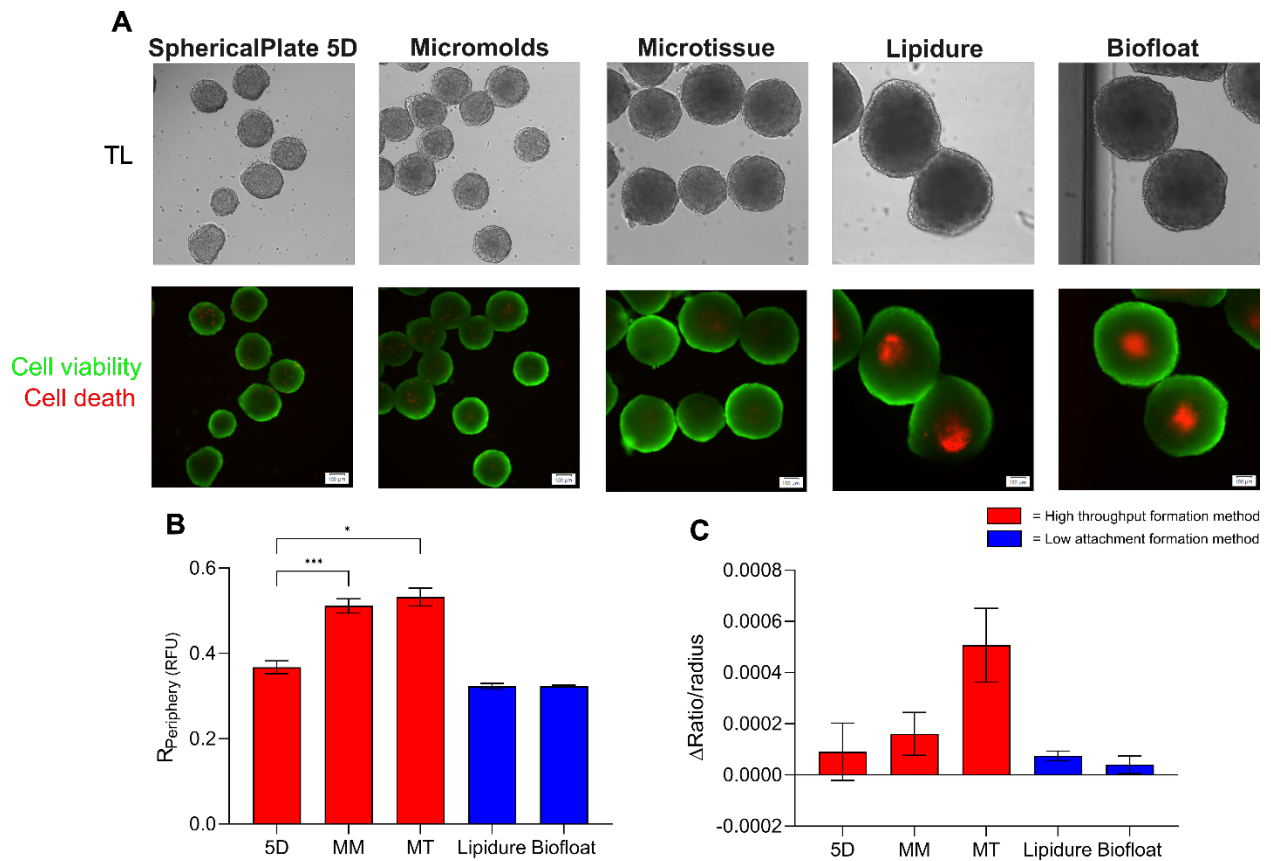

**Supplementary figure S23: Formation methods affect the viability and oxygenation in live HCT116 spheroids.** A: HCT116 spheroids (initial seeding density 500 cells) were grown for 5 days before additional 1 hour-long staining with Propidium Iodide (cell necrosis, red, 1  $\mu\text{g}/\text{ml}$ ) and Calcein Green (viable cells, green, 1  $\mu\text{g}/\text{ml}$ ). Low-attachment formation methods lead to bigger spheroids containing a necrotic core (red). Scale bar is 100  $\mu\text{m}$  B: MMIR1 ratio measurements at the periphery show lower oxygenation in 5D SphericalPlate spheroids compared to other high throughput methods, while low attachment methods are similar C: Steepness of the oxygenation gradient is similar in all methods. Red= high throughput formation methods. Blue= low attachment formation methods. Results show the average  $\pm$  standard error of 6-16 spheroids. 5D= 5D SphericalPlate, MM= Micromold method, MT= MicroTissue method.



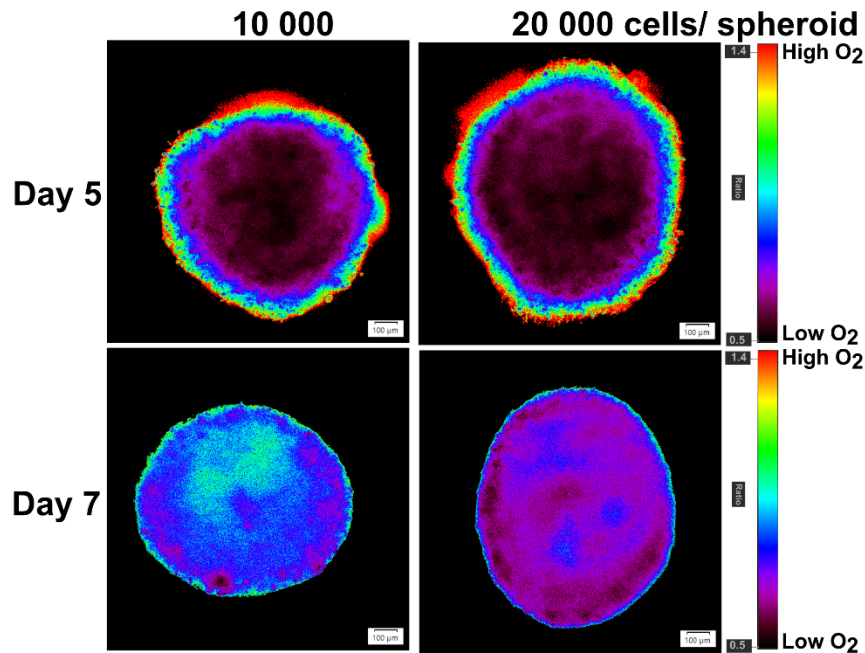

**Supplementary figure S24: Inverted gradient formation in live HCT116 spheroids is both time and size-dependent.** HCT116 spheroids formed by initial seeding 10,000 and 20,000 cells per well are monitored at days 5 and 7. Scale bar is 100  $\mu\text{m}$ .

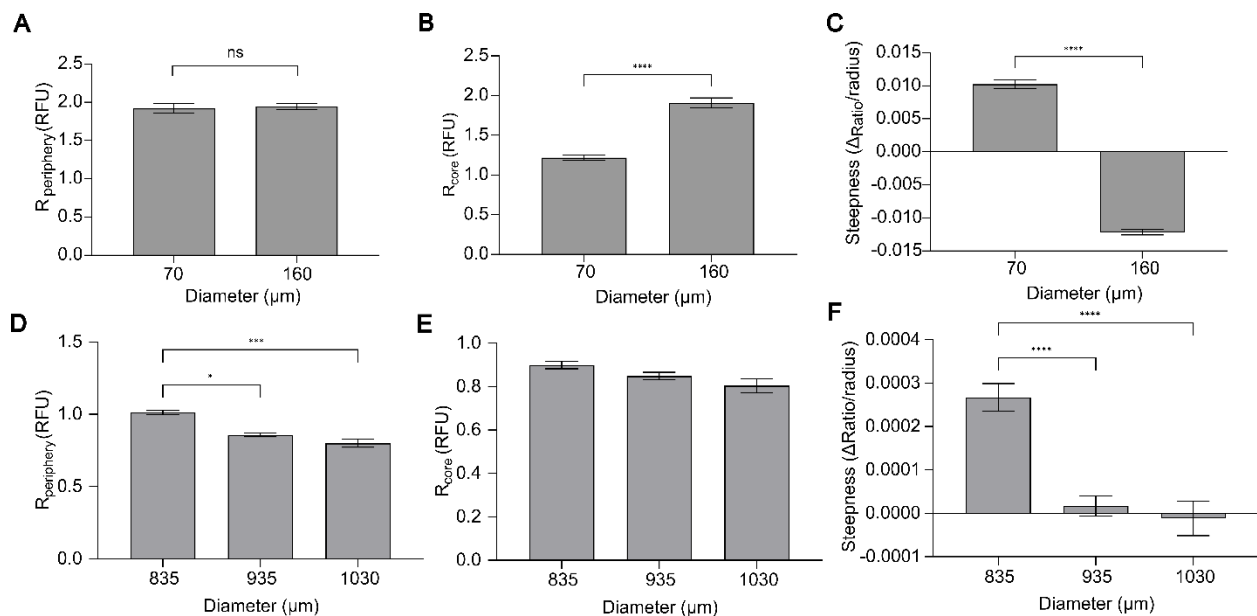

**Supplementary figure S25: Analysis of "inverted" oxygenation gradient in live DPSCs and HCT116 spheroids** (see also Fig. 5, main text). A-C DPSCs was formed using microagarose molds and D-F HCT116 was formed using Lipidure®-coated plates. A and D: MMIR1 ratio measurements at the periphery. B and E: MMIR1 ratio measurements at the core. C and F: Oxygenation gradients.



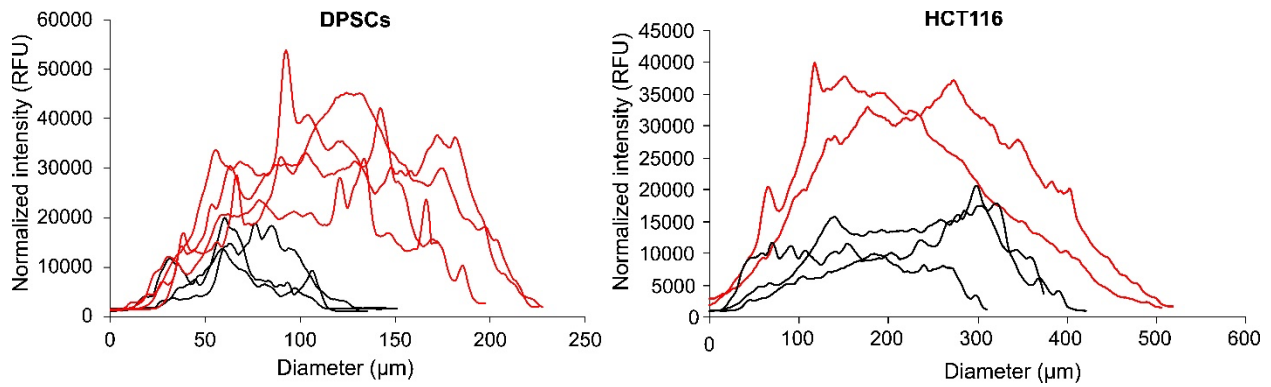

**Supplementary figure S26: Cell death comparison between “direct” and “inverted” gradients in DPSCs and HCT116 spheroids formed on respectively microagarose molds and Lipidure®-coated plates. Co-staining with propidium iodide, PI (cell death, 1 μg/ml 1h). Data shows line profiles of normalized (by area squared) mean intensity ± SEM of 7 spheroids (DPSCs) and 5 spheroids (HCT116). PI= propidium iodide.**

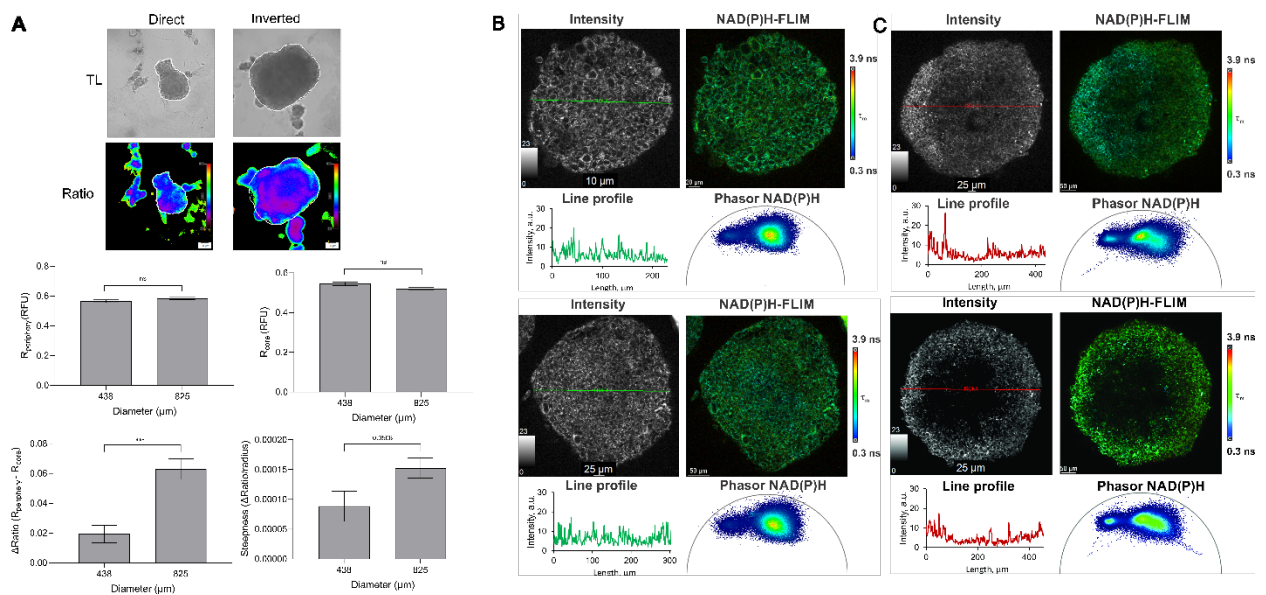

**Supplementary figure S27: Examples of two-photon NAD(P)H-FLIM microscopy and phasor plots of HCT116 spheroids with different sizes. MMIR1 ratiometric analysis, NAD(P)H intensity line profiles and phasor FLIM plots are shown. A: Ratiometric analysis of MMIR1 probe. B: Direct gradient. C: Indirect gradient.**

**Supplementary table ST1: STR authentication HCT116 cell lines**

| Core STR markers | ATCC HCT 116(CCL-247) | HCT 116 HWANG     | HCT 116 ODW       |
|------------------|-----------------------|-------------------|-------------------|
| D7S820           | 11, 12                | 11,12,13          | 11,12,13          |
| CSF1PO           | 7, 10                 | 7, 10             | 7,10,11           |
| TH01             | 8, 9                  | 8, 9              | 8, 9              |
| D13S317          | 10, 12                | 10,11,12,13       | 10,11,12,13       |
| D16S539          | 11, 13                | 11,12,13,14       | 11,12,13,14       |
| vWA              | 17, 22                | 16,17,18,21,22,23 | 16,17,18,21,22,23 |
| TPOX             | 8, 9                  | 8, 8              | 8, 9              |
| AMEL             | X,Y                   | X,X               | X,Y               |
| D5S818           | 10, 11                | 10,11,12          | 10,11,12          |

**Supplementary table ST2: Composition of used growth and imaging media.**

| Cell line                              | Basal medium                                         | Supplements                                                                                                                                                                                 |
|----------------------------------------|------------------------------------------------------|---------------------------------------------------------------------------------------------------------------------------------------------------------------------------------------------|
| DPSC                                   | MEM alpha (Gibco, 32561)                             | 10% Heat-inactivated FBS (Gibco, 12662)                                                                                                                                                     |
| HUVEC                                  | Endothelial Cell Basal Medium 2 (PromoCell, C-22211) | 1x Endothelial Cell Growth Medium 2 SupplementMix (PromoCell, C-39216)                                                                                                                      |
| HCT116 WT                              | McCoy's 5A media (VWR, 392-0420)                     | 10% Heat-inactivated FBS (Gibco, 12662)<br>1 mM Sodium Pyruvate (Gibco, 11360)<br>10 mM HEPES (Gibco, 15630)                                                                                |
| HCT116 SCO <sub>2</sub> <sup>-/-</sup> | McCoy's 5A media (VWR, 392-0420)                     | 10% Heat-inactivated FBS (Gibco, 12662)<br>1 mM Sodium Pyruvate (Gibco, 11360)<br>10 mM HEPES (Gibco, 15630)                                                                                |
| HCT116 KO                              | McCoy's 5A media (VWR, 392-0420)                     | 10% Heat-inactivated FBS (Gibco, 12662)<br>1 mM Sodium Pyruvate (Gibco, 11360)<br>10 mM HEPES (Gibco, 15630)                                                                                |
| SKOV3                                  | McCoy's 5A media (VWR, 392-0420)                     | 10% Heat-inactivated FBS (Gibco, 12662)<br>1 mM Sodium Pyruvate (Gibco, 11360)<br>10 mM HEPES (Gibco, 15630)                                                                                |
| MCF7                                   | DMEM (Sigma, D5030)                                  | 2 mM GlutaMAX (Gibco, 35050)<br>10 mM HEPES (Gibco, 15630)<br>1 mM Sodium pyruvate (Gibco, 11360)<br>10% Heat-inactivated FBS (Gibco, 12662)                                                |
| PANC1                                  | DMEM (Sigma, D5030)                                  | 2 mM L-glutamine (Gibco, 25030)<br>10 mM HEPES (Gibco, 15630)<br>1 mM Sodium pyruvate (Gibco, 11360)<br>10% Heat-inactivated FBS (Gibco, 12662)                                             |
| HEK293T                                | DMEM (Sigma, D5030)                                  | 2 mM L-glutamine (Gibco, 25030)<br>10 mM HEPES (Gibco, 15630)<br>1 mM Sodium pyruvate (Gibco, 11360)<br>10% Heat-inactivated FBS (Gibco, 12662)                                             |
| Imaging medium                         | DMEM (Sigma, D5030)                                  | 2 mM L-glutamine (Gibco, 25030)<br>10 mM HEPES, pH 7.2 (Gibco, 15630)<br>1 mM Sodium pyruvate (Gibco, 11360)<br>10% Heat-inactivated FBS (Gibco, 12662)<br>10 mM D(+)-glucose (Merck, 8342) |

**Supplementary table ST3: morphological characterization of spheroid populations**

| Number                                                                                                       | General O <sub>2</sub> gradient shape | Glycolytic core size (% from total spheroid area) | d, pixels | Morphological characteristics of individual spheroids                                                                                                           |
|--------------------------------------------------------------------------------------------------------------|---------------------------------------|---------------------------------------------------|-----------|-----------------------------------------------------------------------------------------------------------------------------------------------------------------|
| 1                                                                                                            | Forward                               | 0                                                 | 436.75    | Diameter is 275.85 μm. No clear core; homogeneous distribution of long and short autofluorescence lifetime                                                      |
| 2                                                                                                            | Forward                               | 29.84078069                                       | 400.94    | Diameter is 388.23 μm. Small core with close to central localization                                                                                            |
| 3                                                                                                            | Forward                               | 22.66822022                                       | 396.24    | Diameter is 320.81 μm. Small core with close to central localization                                                                                            |
| 4                                                                                                            | Forward                               | 0                                                 | 407.91    | Diameter is 239.18 μm. No clear core; homogeneous distribution of long and short autofluorescence lifetime                                                      |
| 5                                                                                                            | Forward                               | 25.34300697                                       | 428.16    | Diameter is 275.97 μm. Small core with close to central localization                                                                                            |
| 6                                                                                                            | Forward                               | 12.02982783                                       | 433.12    | Diameter is 348.85 μm. Small core with close to central localization                                                                                            |
| 7                                                                                                            | Forward                               | 0                                                 | 414.62    | Diameter is 337.24 μm. No clear core; homogeneous distribution of long and short autofluorescence lifetime                                                      |
| 8                                                                                                            | Forward                               | 0                                                 | 451.03    | Diameter is 328.89 μm. No clear core; homogeneous distribution of long and short autofluorescence lifetime                                                      |
| <b>Summary:</b> 50 % of spheroids with an average glycolytic core size of 22.5% from the total spheroid area |                                       |                                                   |           |                                                                                                                                                                 |
| 1                                                                                                            | Inverted                              | 26.96279845                                       | 415.21    | Diameter is 455.18 μm. Core with close to central localization                                                                                                  |
| 2                                                                                                            | Inverted                              | 47.93264855                                       | 402.10    | Diameter is 415.09 μm. Core shifted toward spheroid periphery                                                                                                   |
| 3                                                                                                            | Inverted                              | 66.73045697                                       | 377.75    | Diameter 461.6 μm. Core shifted toward spheroid periphery; cells with long lifetime and low intensity observed inside the core                                  |
| 4                                                                                                            | Inverted                              | 41.66305525                                       | 402.57    | Diameter is 449.18 μm. Core shifted toward spheroid periphery; cells with long lifetime and low intensity observed inside the core                              |
| 5                                                                                                            | Inverted                              | 52.06284481                                       | 391.30    | Diameter is 451.96 μm. Core shifted toward spheroid periphery; cells with long lifetime and low intensity observed inside the core                              |
| 6                                                                                                            | Inverted                              | 71.83703873                                       | 377.59    | Diameter is 507.7 μm. Core with close to central localization; cells with long lifetime and low intensity observed inside the core, appearance of empty spaces  |
| 7                                                                                                            | Inverted                              | 70.54834055                                       | 390.93    | Diameter is 615 μm. Core with close to central localization; the drop of autofluorescence intensity in the middle of the core                                   |
| 8                                                                                                            | Inverted                              | 44.84668557                                       | 413.01    | Diameter is 564.62 μm. Core with close to central localization; cells with long lifetime and low intensity observed inside the core, appearance of empty spaces |

|                                                                                                                  |          |             |        |                                                                                                                                                                             |
|------------------------------------------------------------------------------------------------------------------|----------|-------------|--------|-----------------------------------------------------------------------------------------------------------------------------------------------------------------------------|
| 9                                                                                                                | Inverted | 71.78658835 | 421.19 | Diameter is 577.51 $\mu\text{m}$ . Core shifted toward spheroid periphery; the drop of autofluorescence intensity inside the core                                           |
| 10                                                                                                               | Inverted | 47.52877651 | 405.58 | Diameter is 579.48 $\mu\text{m}$ . Core with close to central localization; cells with long lifetime and low intensity observed inside the core, appearance of empty spaces |
| <b>Summary:</b> <i>100% spheroids with an average glycolytic core size of 54.2% from the total spheroid area</i> |          |             |        |                                                                                                                                                                             |
